# Supplementary material
Source: publisher figshare collection journal article supplement (https://acs.figshare.com/ndownloader/files/4858192)

**Supplemental Material:**

**Assessment of the mitigative capacity of dietary zinc on PCB126 hepatotoxicity and the contribution of zinc to toxicity.**

Klaren WD<sup>†,‡</sup>, Gibson-Corley KN<sup>§</sup>, Wels B<sup>||</sup>, Simmons DL<sup>||</sup>, McCormick ML<sup>⊥</sup>, Spitz DR<sup>†,⊥</sup>, Robertson LW<sup>†,‡,\*</sup>

<sup>†</sup>Interdisciplinary Graduate Program in Human Toxicology, University of Iowa, Iowa City, Iowa

<sup>‡</sup>Department of Occupational and Environmental Health, College of Public Health, University of Iowa, Iowa City, Iowa

<sup>§</sup>Department of Pathology, University of Iowa, Iowa City, Iowa

<sup>||</sup>State Hygienic Laboratory, University of Iowa, Ankeny, Iowa

<sup>⊥</sup>Free Radical and Radiation Biology Program, University of Iowa Carver College of Medicine, Iowa City, Iowa

\*Corresponding Author

Larry W. Robertson, Ph.D., M.P.H., ATS, Professor  
Department of Occupational and Environmental Health  
The University of Iowa, College of Public Health  
100 Oakdale Campus #219 IREH  
Iowa City, Iowa 52242-5000  
Phone: 319-335-4346  
Fax: 319-335-4290  
Email: [larry-robertson@uiowa.edu](mailto:larry-robertson@uiowa.edu)

**Table S1:** Primer sequences used for the qPCR analysis of hepatic gene expression.

|         | <b>Forward</b>              | <b>Reverse</b>               |
|---------|-----------------------------|------------------------------|
| MTI     | 5'-caccgttgctccagattcac-3'  | 5'-gcagcagcactgttcgtcac-3'   |
| MTII    | 5'-atctccaactgccgcctcc-3'   | 5'-tgcacttgccgaagcctct-3'    |
| CYP1A1  | 5'-ccatgaccaggaactatggg-3'  | 5'-tctggtgagcatccaggaca-3'   |
| B-actin | 5'-tagagccaccaatccacacag-3' | 5'-cagccttccttctctgggtatg-3' |

**Table S2:** P-Values from Two-Way ANOVA analysis. (Red indicates significance; p<0.05; n=6)

|                               | Dietary Effect | Treatment Effect | Interaction |
|-------------------------------|----------------|------------------|-------------|
| <i>Rel. Liver Wt.</i>         | 0.0974         | <0.0001          | 0.8121      |
| <i>Rel. Thymus Wt.</i>        | 0.9669         | <0.0001          | 0.1374      |
| <i>Hepatic CYP1A1 Exp.</i>    | <0.0001        | <0.0001          | 0.0015      |
| <i>Hepatic Lipids</i>         | 0.0144         | <0.0001          | 0.0396      |
| <i>Hepatic ROS</i>            | <0.0001        | <0.0001          | 0.0002      |
| <i>Hepatic CuZnSOD Act.</i>   | 0.0067         | <0.0001          | 0.0763      |
| <i>Hepatic MnSOD Act.</i>     | 0.3714         | 0.0017           | 0.3145      |
| <i>Hepatic Total SOD Act.</i> | 0.0805         | <0.0001          | 0.2444      |
| <i>Hepatic MTI Exp.</i>       | <0.0001        | <0.0001          | <0.0001     |
| <i>Hepatic MTII Exp.</i>      | <0.0001        | 0.0003           | <0.0001     |
| <i>Hepatic Cu</i>             | 0.6812         | <0.0001          | 0.6770      |
| <i>Hepatic Zn</i>             | <0.0001        | <0.0001          | 0.2254      |
| <i>Hepatic Se</i>             | 0.3558         | <0.0001          | 0.0152      |
| <i>Hepatic Mn</i>             | <0.0001        | <0.0001          | 0.4704      |
| <i>Renal Cu</i>               | <0.0001        | 0.0002           | <0.0001     |
| <i>Renal Zn</i>               | <0.0001        | <0.0001          | 0.0396      |
| <i>Renal Se</i>               | <0.0001        | <0.0001          | 0.2834      |
| <i>Renal Mn</i>               | <0.0001        | <0.0001          | 0.5161      |

**Figure S1:** Growth curve and feed consumption during the animals study. Day of exposure marked by vertical line at 24 days.

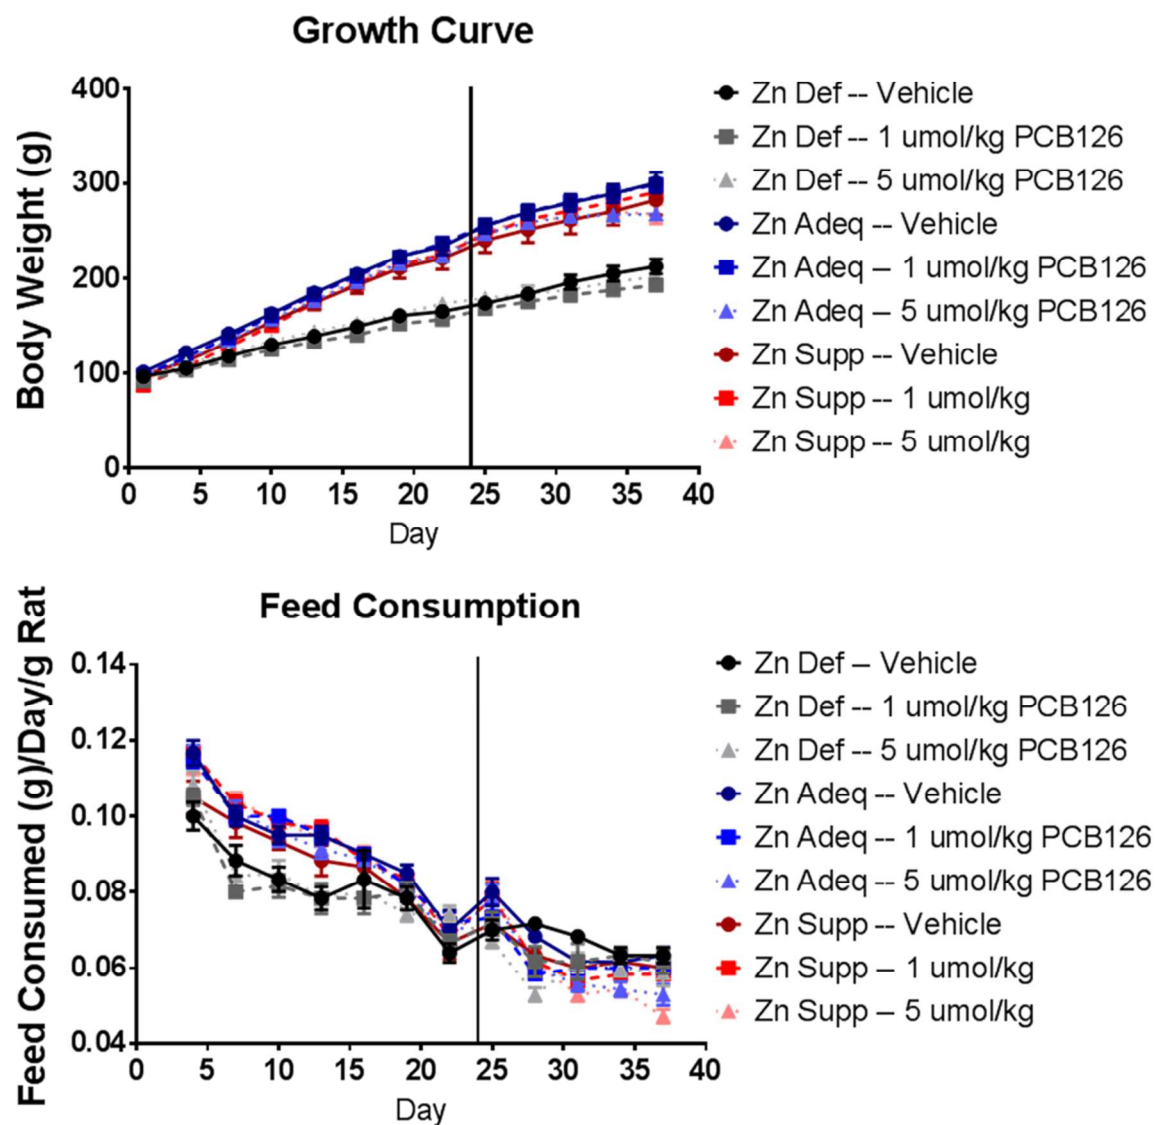

**Figure S2:** Absolute organ weights for liver and thymus. (Bars are standard error; Two-Way ANOVA; n=6; \* represents p<0.05 compared to vehicle in same diet; # represents p<0.05 compared to same treatment in adequate zinc diet).

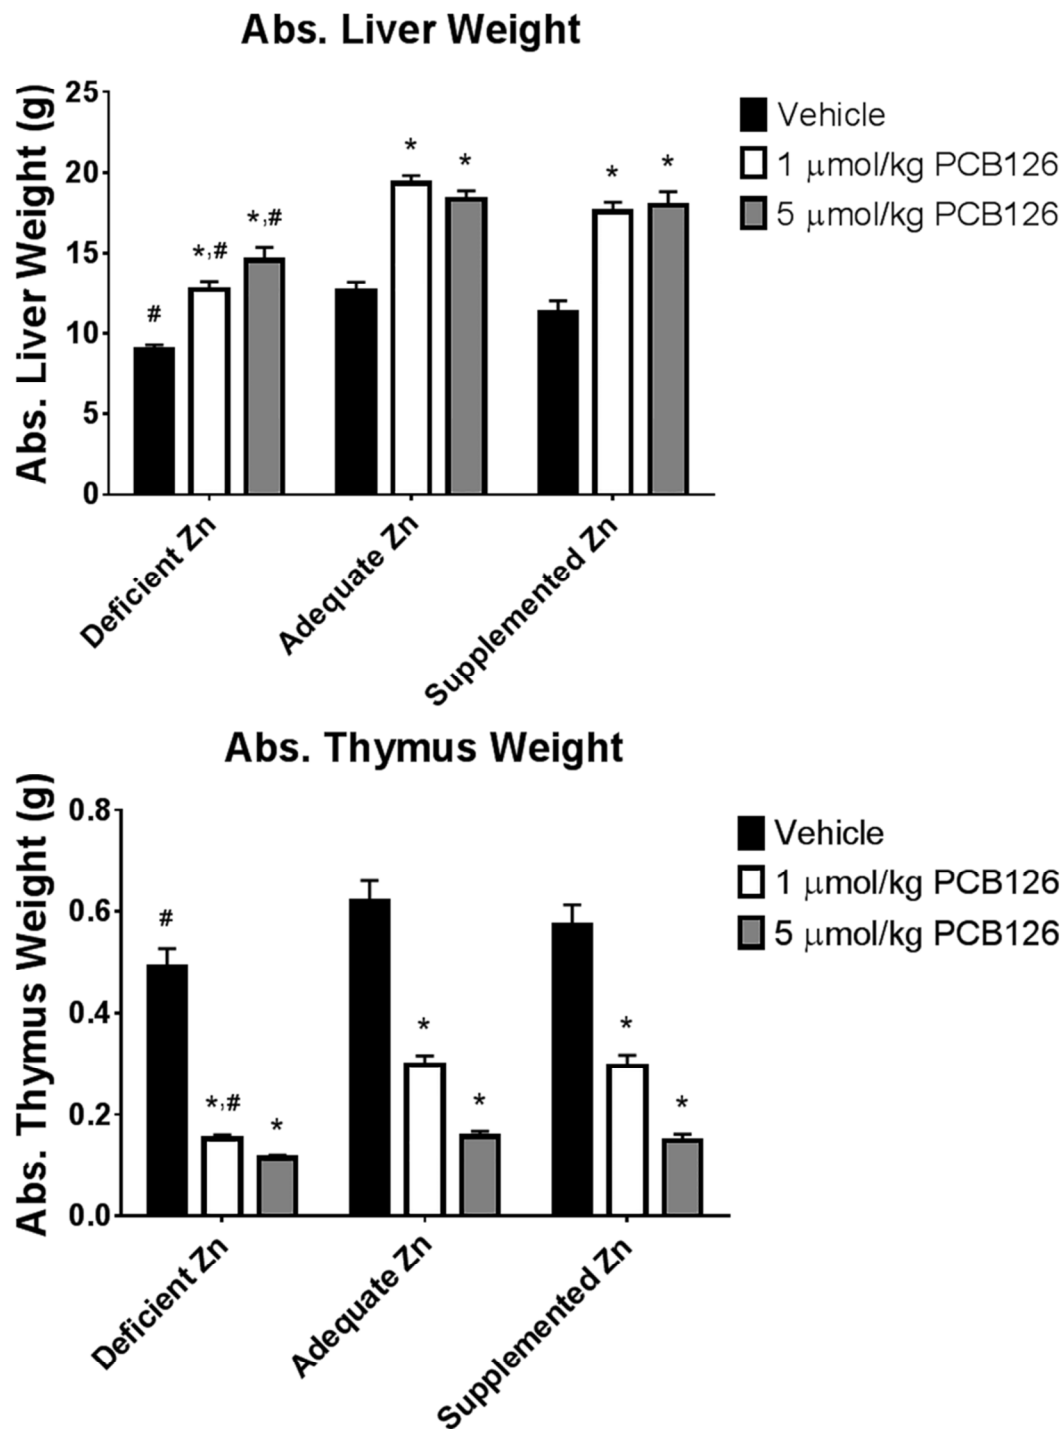

**Figure S3:** Metal level changes in the liver with the omission of hepatic lipids following PCB126 exposure and with varying zinc levels in the diet. (Bars are standard error; Two-Way ANOVA; n=6; \* represents p<0.05 compared to vehicle in same diet; # represents p<0.05 compared to same treatment in adequate zinc diet).

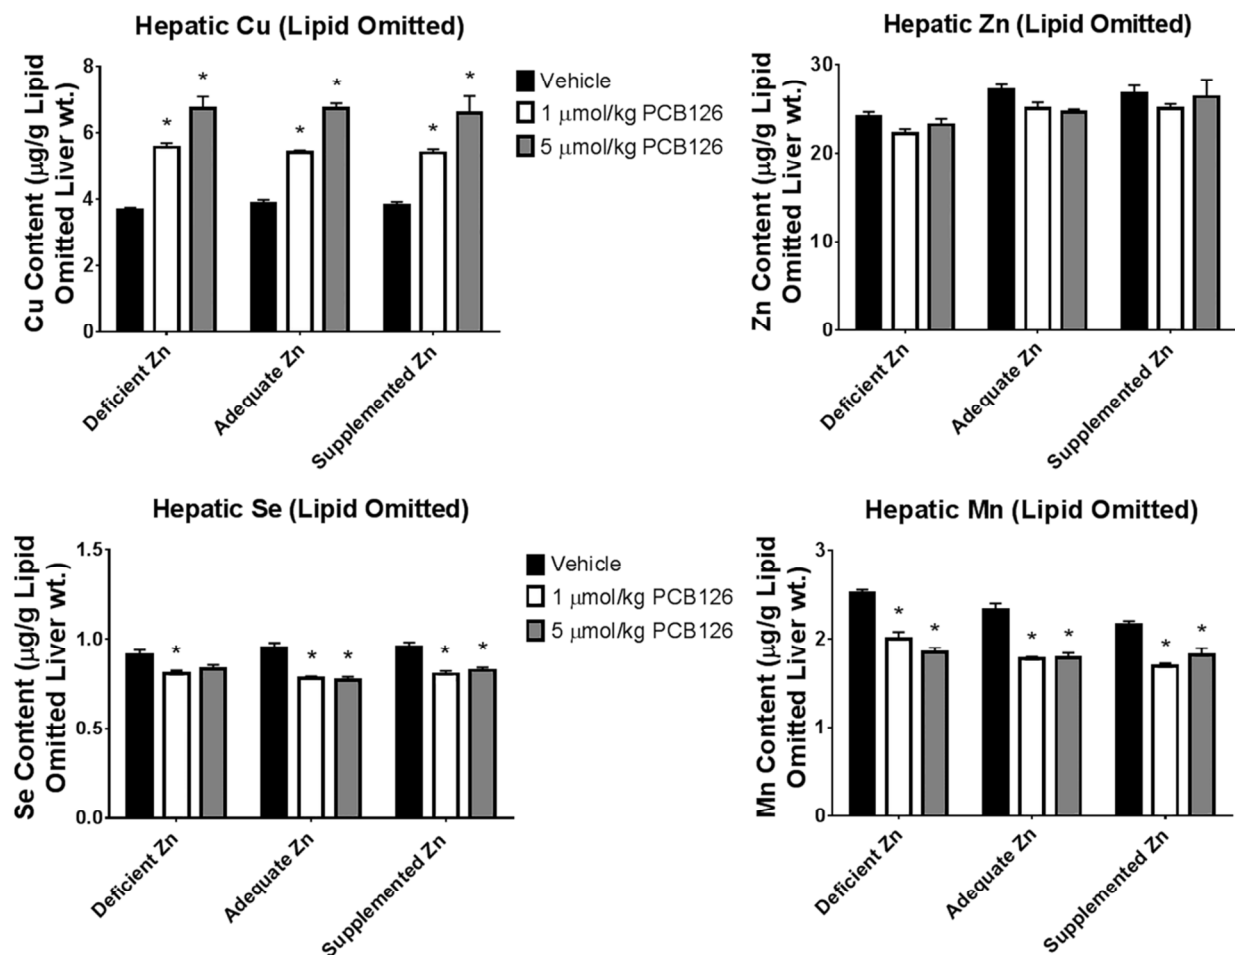

**Figure S4:** Metal level changes in the kidney following PCB126 exposure and with varying zinc levels in the diet. (Bars are standard error; Two-Way ANOVA; n=6; \* represents  $p < 0.05$  compared to vehicle in same diet; # represents  $p < 0.05$  compared to same treatment in adequate zinc diet).

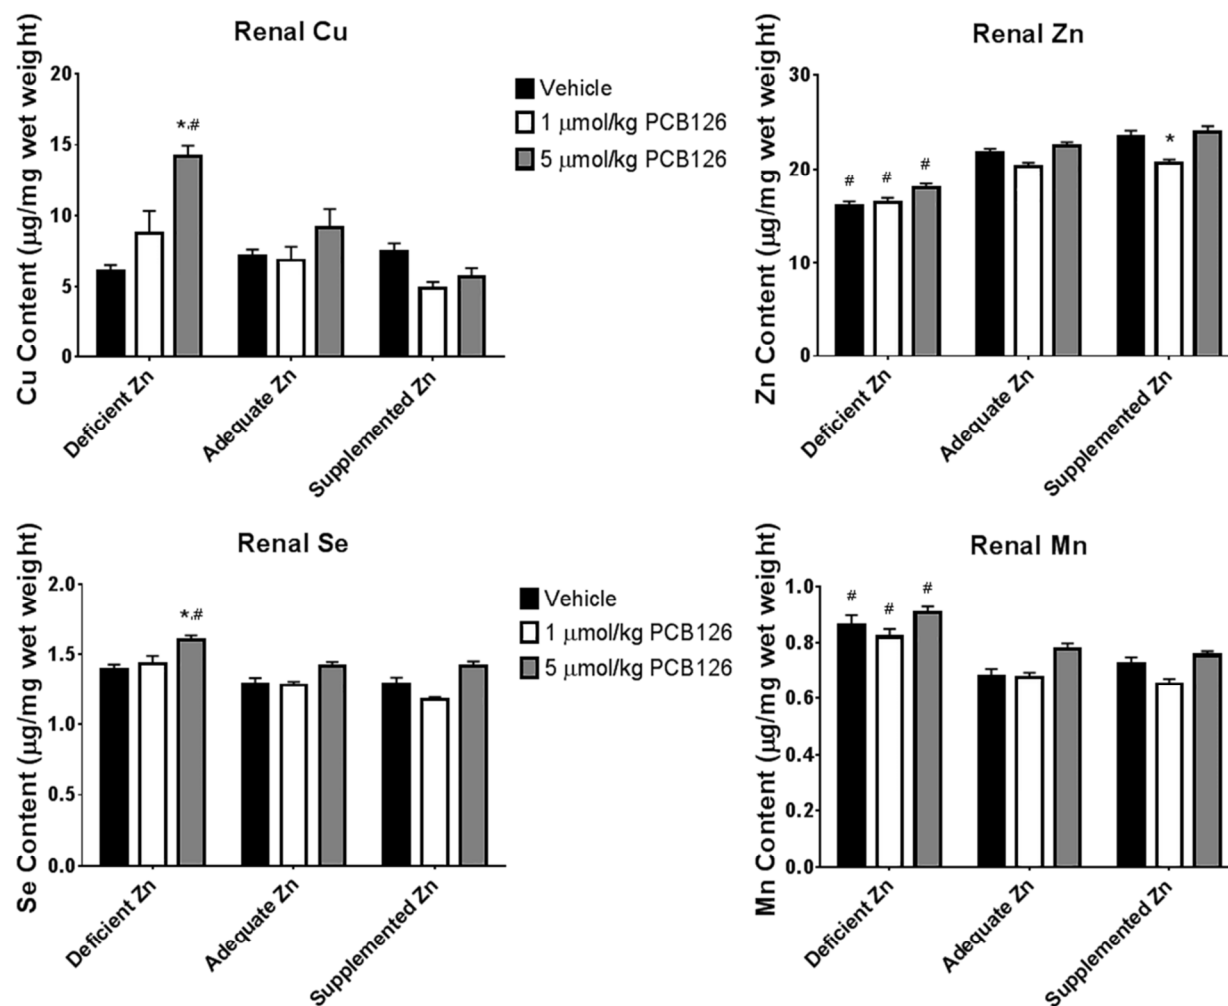

Supplement: Supplementary file 1 [file 4858192]
